# Supplementary material for: Phytochemical Analysis of Phenolics, Sterols, and Terpenes in Colored Wheat Grains by Liquid Chromatography with Tandem Mass Spectrometry
Source: MDPI journal article supplement (doi:10.3390/molecules26185580), 2021-09-14
Supplement: s1 [file s1]

## Supplementary Materials

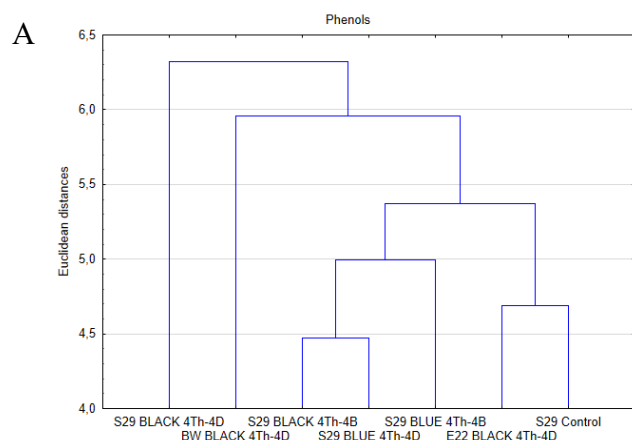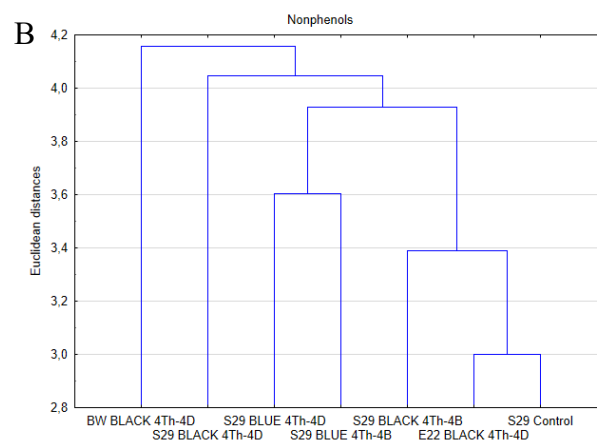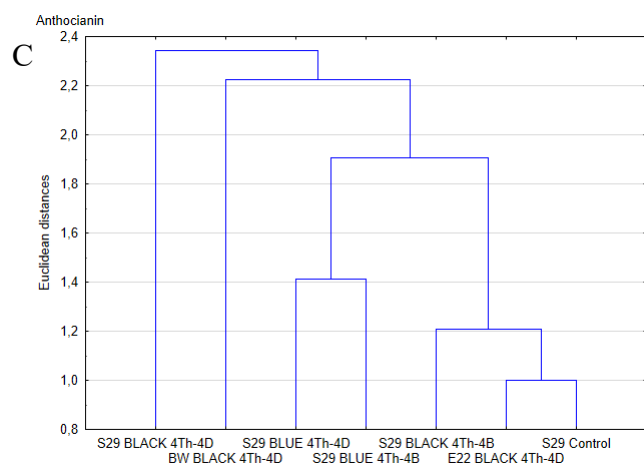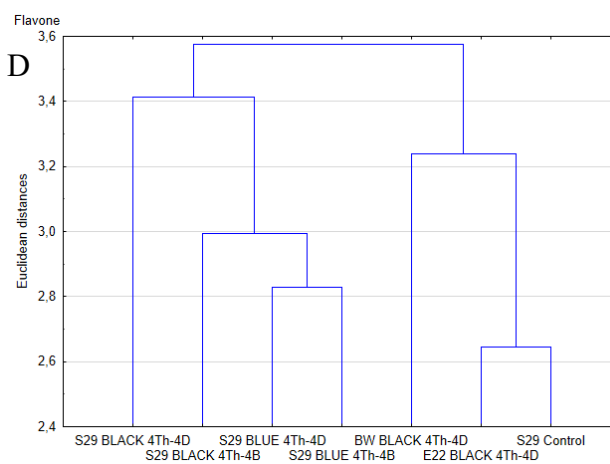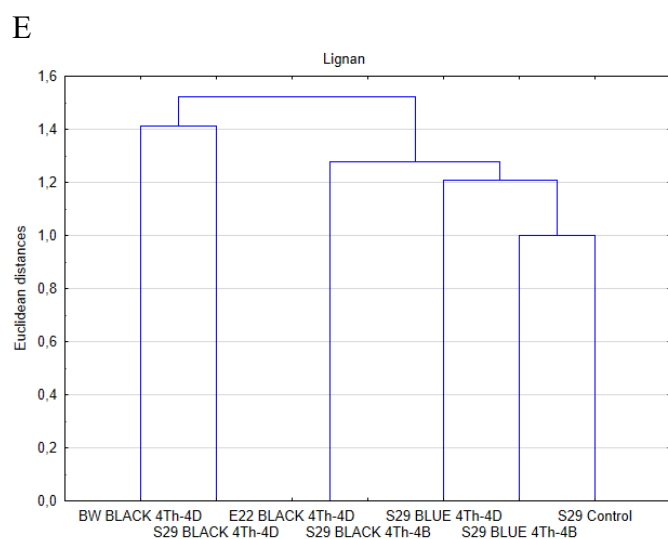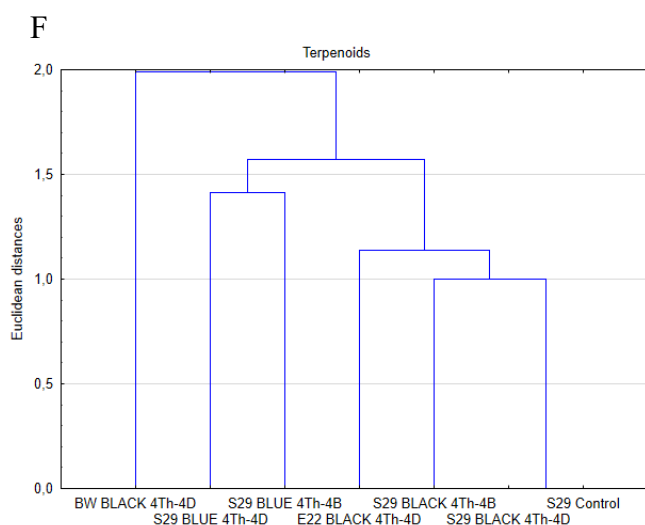

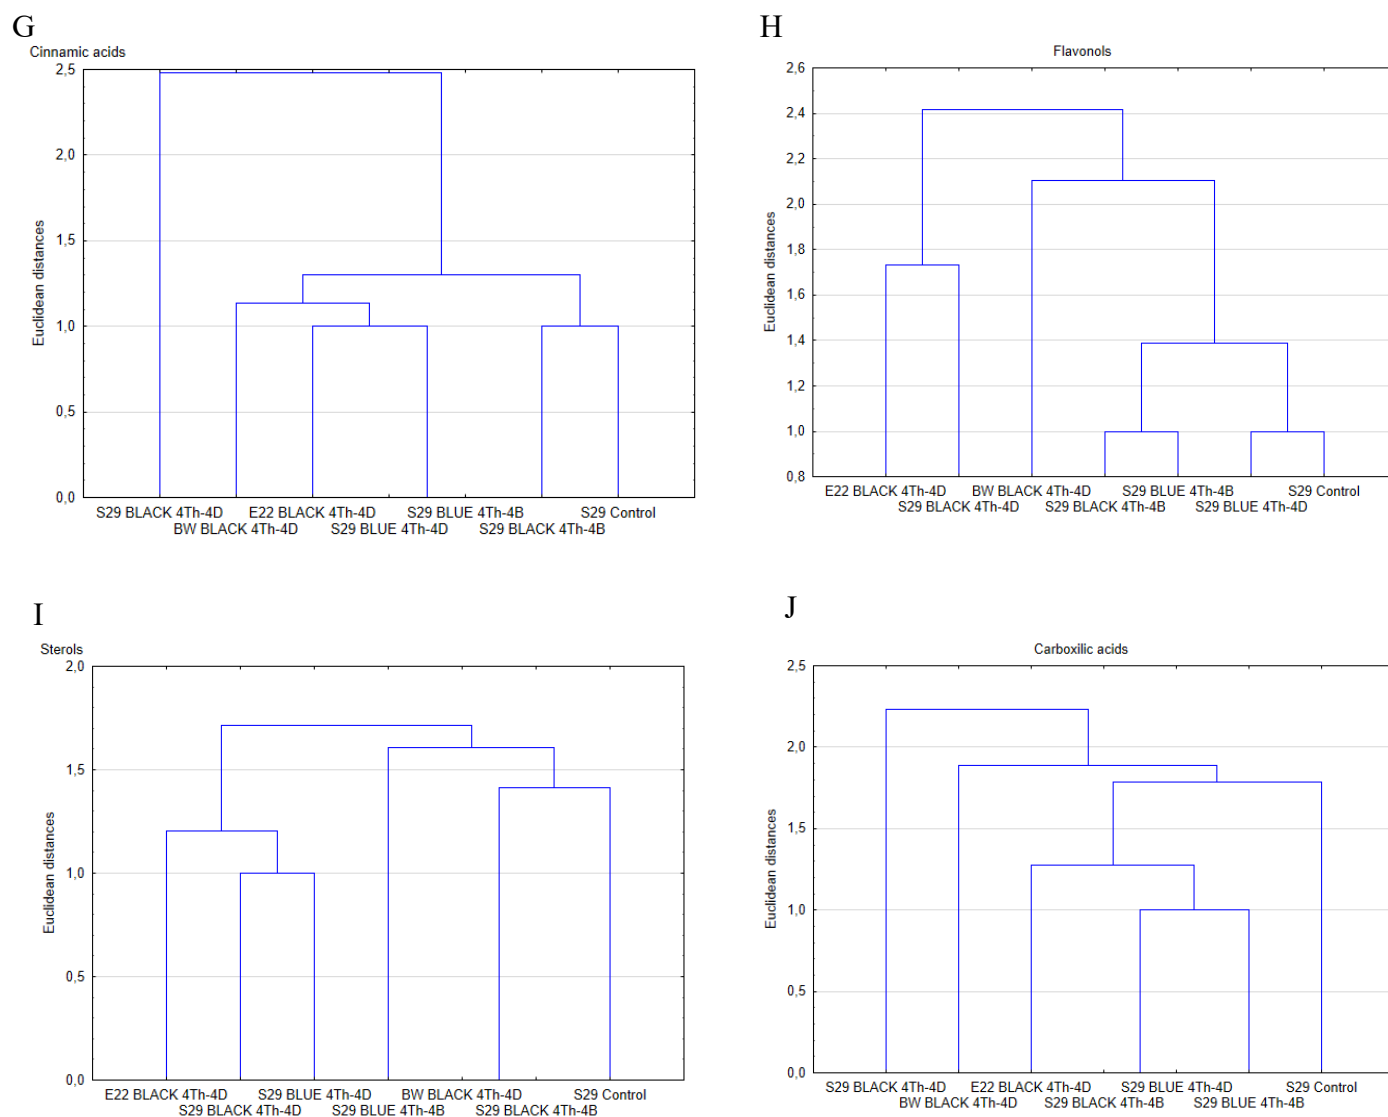

**Figure S1.** Dendrograms for seven *T. aestivum* lines. The trees were built using the UPGMA and Euclidean distance from data on phenolic (A), nonphenolic (B) substances, anthocyanins (C), flavones (D), lignins (E), terpenoids (F), cinnamic acids (G), flavonols (H), sterols (I), and carboxyl acids (J).

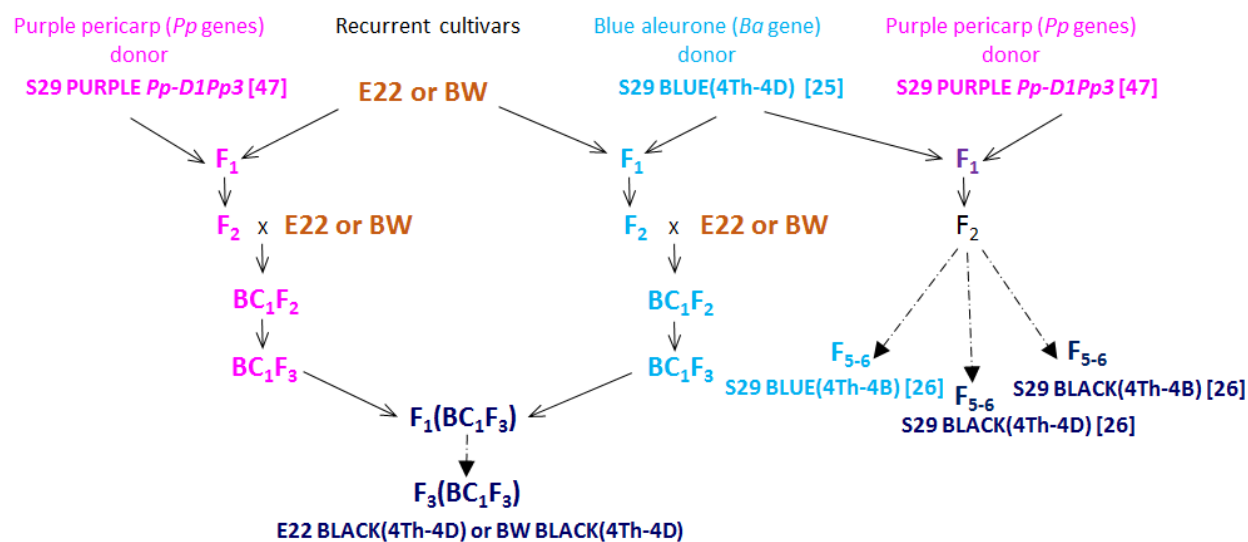

**Figure S2.** The breeding scheme for the development of the blue- and black-grained wheat lines used in this study. Abbreviations: BW, BW49880; E22, Element 22; S29, Saratovskaya 29.

**Table S1.** The presence of biologically active compounds in the wheat lines grouped by chromosome substitution, grain color, or both.

| Class                                                            | Family of Compounds             | Identification                                               | S29 | S29<br>BLACK<br>4Th-4B | S29<br>BLUE<br>4Th-4B | S29<br>BLUE<br>4Th-4D | S29<br>BLACK<br>4Th-4D | E22<br>BLACK<br>4Th-4D | BW<br>BLACK<br>4Th-4D |
|------------------------------------------------------------------|---------------------------------|--------------------------------------------------------------|-----|------------------------|-----------------------|-----------------------|------------------------|------------------------|-----------------------|
| <i>The compounds of the lines with chromosome 4B substituted</i> |                                 |                                                              |     |                        |                       |                       |                        |                        |                       |
| PHENOLICS                                                        | Flavonol                        | Selgin                                                       |     | 1                      | 1                     |                       |                        |                        |                       |
| OTHERS                                                           | Sesquiterpenoid plant hormone   | Absciscic acid [Dormin; Abscisin II; (S)-(+)-Absciscic acid] |     | 1                      | 1                     |                       |                        |                        |                       |
| <i>The compounds of the lines with chromosome 4D substituted</i> |                                 |                                                              |     |                        |                       |                       |                        |                        |                       |
| PHENOLICS                                                        | Anthocyanin                     | Peonidin-3-O-glucoside                                       |     |                        |                       |                       | 1                      |                        | 1                     |
|                                                                  | Hydroxycinnamic acid            | Caffeic acid derivative                                      |     |                        |                       |                       | 1                      |                        | 1                     |
|                                                                  | Flavone                         | Apigenin                                                     |     |                        |                       | 1                     | 1                      |                        | 1                     |
|                                                                  | Flavonol                        | Isorhamnetin                                                 |     |                        |                       |                       | 1                      | 1                      | 1                     |
|                                                                  |                                 | Kaempferol                                                   |     |                        |                       |                       | 1                      | 1                      |                       |
|                                                                  |                                 | Rhamnetin II                                                 |     |                        |                       |                       | 1                      | 1                      |                       |
|                                                                  |                                 | Taxifolin-O-pentoside                                        |     |                        |                       |                       | 1                      | 1                      | 1                     |
|                                                                  | Hydroxybenzoic acid             | Salvianolic acid G                                           |     |                        |                       | 1                     |                        | 1                      | 1                     |
| OTHERS                                                           | Alpha, omega-dicarboxylic acid  | Undecanedioic acid                                           |     |                        |                       |                       | 1                      |                        | 1                     |
|                                                                  | Cycloartanol [Steroids]         | Cyclopasilloic acid glucoside                                |     |                        |                       | 1                     |                        | 1                      |                       |
|                                                                  | Indole sesquiterpene alkaloid   | Sespendole                                                   |     |                        |                       | 1                     | 1                      |                        |                       |
|                                                                  | Isoquinoline alkaloid           | Berberine [Berberin; Umbellatine; Berbericine]               |     |                        |                       |                       | 1                      |                        | 1                     |
|                                                                  | Sterol                          | $\beta$ -Sitosterone [Stigmast-4-En-3-One; Sitosterone]      |     |                        |                       | 1                     | 1                      | 1                      |                       |
| <i>The compounds of the lines with blue color of grain</i>       |                                 |                                                              |     |                        |                       |                       |                        |                        |                       |
| PHENOLICS                                                        | Anthocyanin                     | Malvidin 3-O-rutinoside-5-O-glucoside                        |     |                        | 1                     | 1                     |                        |                        |                       |
|                                                                  |                                 | Petunidin 3-O-rutinoside-5-O-glucoside                       |     |                        | 1                     | 1                     |                        |                        |                       |
|                                                                  | Flavone                         | Apigenin 2''-O-sinapoyl, C-hexosyl, C-pentosyl               |     |                        | 1                     | 1                     |                        |                        |                       |
|                                                                  | Glycosylated flavone            | Vicenin-2 [Apigenin-6,8-Di-C-Glucoside]                      |     |                        | 1                     | 1                     |                        |                        |                       |
| OTHERS                                                           | Diterpenoid                     | Isocryptotanshinone II                                       |     |                        | 1                     | 1                     |                        |                        |                       |
|                                                                  | Thromboxane receptor antagonist | Vapiprost                                                    |     |                        | 1                     | 1                     |                        |                        |                       |
| <i>The compounds of the lines with black color of grain</i>      |                                 |                                                              |     |                        |                       |                       |                        |                        |                       |
| PHENOLICS                                                        | Flavonol                        | Isorhamnetin                                                 |     |                        |                       |                       | 1                      | 1                      | 1                     |
|                                                                  |                                 | Taxifolin-O-pentoside                                        |     |                        |                       |                       | 1                      | 1                      | 1                     |
